# Supplementary material for: C-Phycocyanin Suppresses the In Vitro Proliferation and Migration of Non-Small-Cell Lung Cancer Cells through Reduction of RIPK1/NF-κB Activity
Source: MDPI journal article supplement (doi:10.3390/md17060362), 2019-06-18
Supplement: s1 [file s1]

Article

# **C-phycocyanin suppresses the in vitro proliferation and migration of non-small cell lung cancer cells through reducing RIPK1/NF- $\kappa$ B activity**

**Shuai Hao \*, Shuang Li, Jing Wang, Lei Zhao, Yan Yan, Tingting Wu, Jiawen Zhang and Chengtao Wang \***

Beijing Advanced Innovation Center for Food Nutrition and Human Health, Beijing Engineering and Technology Research Center of Food Additives, Beijing Technology and Business University, Beijing 100048, China; lishuangldw@163.com (S.L.); trotwj960@163.com (J.W.); zhaolei@th.btbu.edu.cn (L.Z.); 15128470659@163.com (Y.Y.); m18810529269@163.com (T.W.); zhangjiawen98@outlook.com (J.Z.)

\* Correspondence: Correspondence: haoshuai@btbu.edu.cn (S.H.); ctwangbtbu@163.com (C.W.)

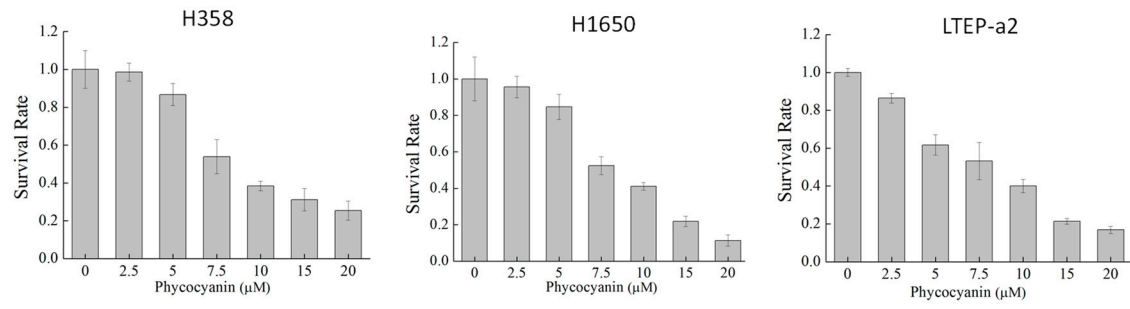

**Figure S1. Cell survival rate analysis of NSCLC cells after phycocyanin treatment.** H358, H1650 and LTP-a2 cell lines were treated with different concentrations (0, 2.5, 5, 7.5, 10, 15, and 20  $\mu$ M) of phycocyanin for 48 h and subjected to a survival rate analysis.

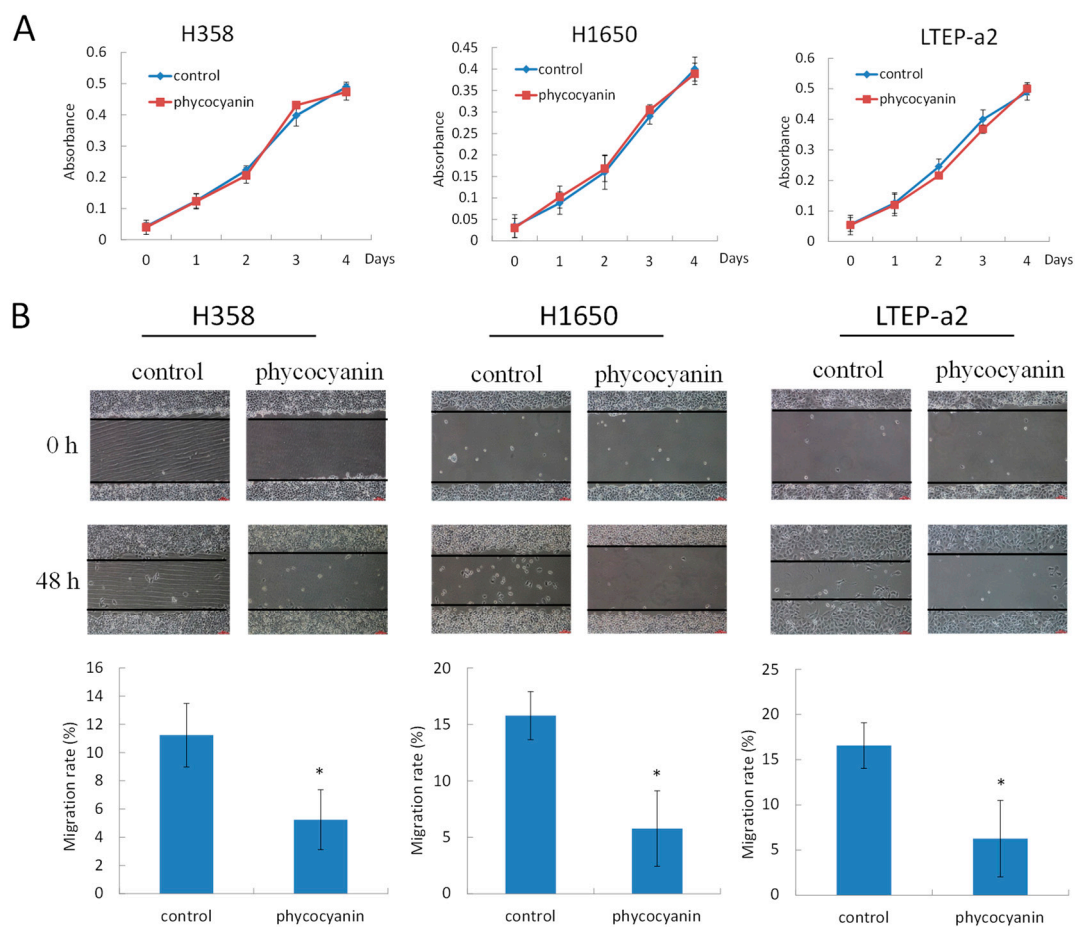

**Figure S2. Proliferation and migration analysis of NSCLC cells after treatment with low concentration of phycocyanin (2.5  $\mu$ M).** (A) Proliferation analysis of NSCLC cells after 2.5  $\mu$ M phycocyanin treatment. (B) Wound-healing analysis of the migration of NSCLC cells after 2.5  $\mu$ M phycocyanin treatment. Bars represent mean  $\pm$  SD. \*,  $p < 0.05$ ; \*\*,  $p < 0.01$ .

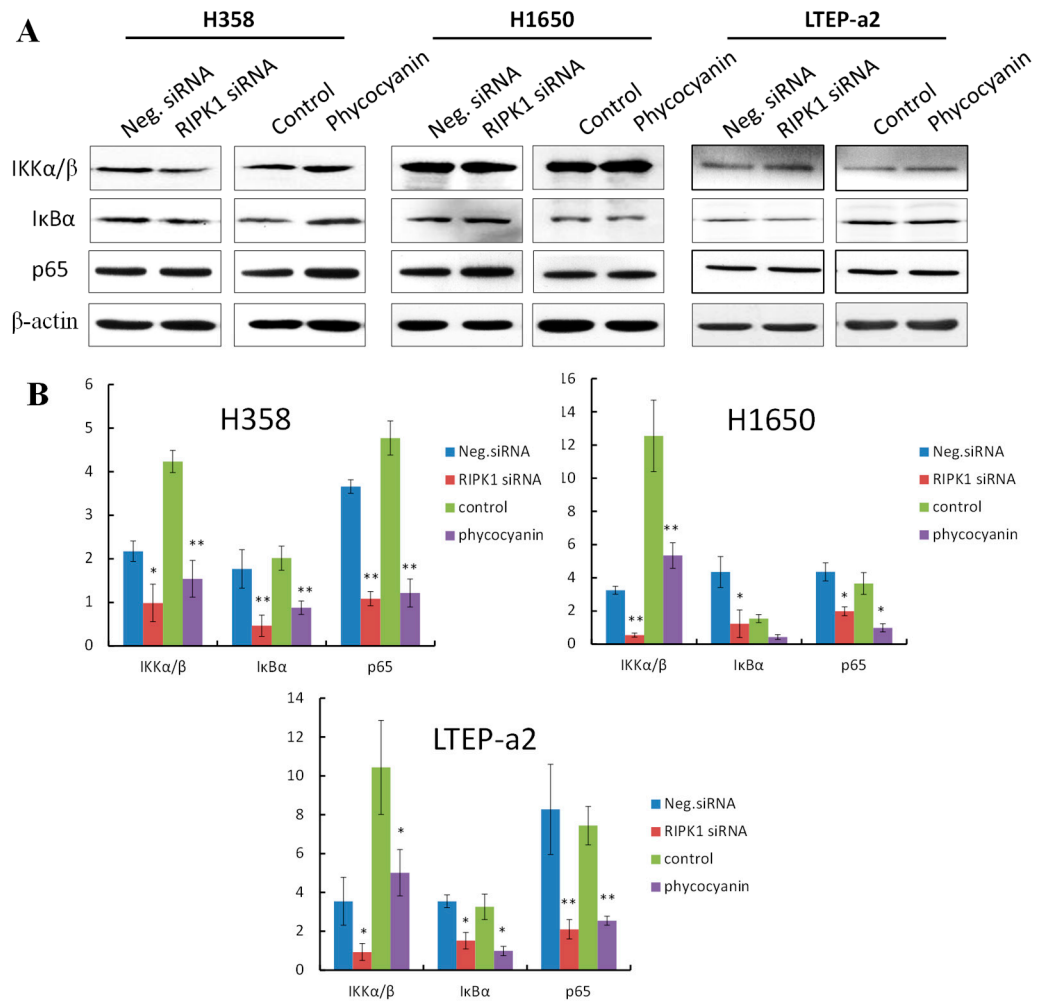

**Figure S3. Western blot analysis of total expressions of IKK $\alpha$ / $\beta$ , I $\kappa$ B $\alpha$ , p65 and phosphor/total ratios analysis of these proteins. (A) Western blot analysis of total expressions of IKK $\alpha$ / $\beta$ , I $\kappa$ B $\alpha$  and p65 proteins after RIPK1 siRNA and phycocyanin treatment, respectively. (B) Phospho/total ratios of these proteins in three NSCLC cell lines. Bars represent mean  $\pm$  SD. \*,  $p < 0.05$ ; \*\*,  $p < 0.01$ .**

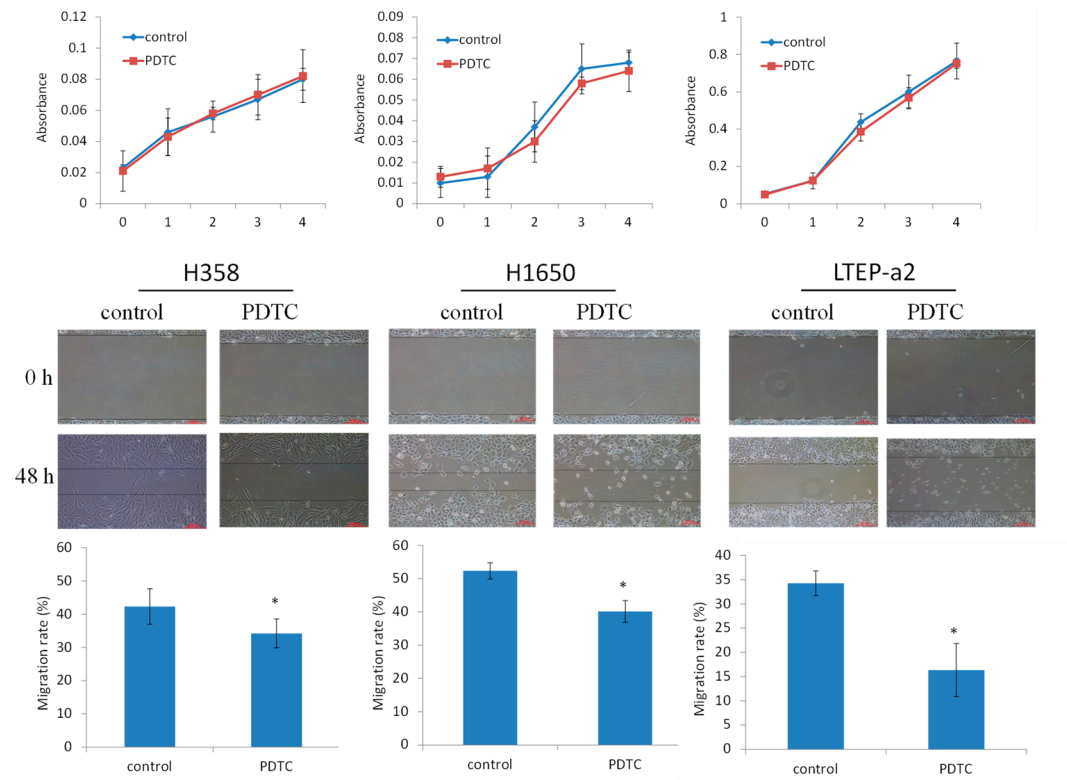

**Figure S4. Proliferation and migration analysis of NSCLC cells after treatment with low concentration of PDTC (2.5 μM).** (A) Proliferation analysis of NSCLC cells after 2.5 μM PDTC treatment. (B) Wound-healing analysis of the migration of NSCLC cells after 2.5 μM PDTC treatment. Bars represent mean ± SD. \*,  $p < 0.05$ ; \*\*,  $p < 0.01$ .
