# Supplementary material for: C-Phycocyanin Suppresses the In Vitro Proliferation and Migration of Non-Small-Cell Lung Cancer Cells through Reduction of RIPK1/NF-κB Activity
Source: Mar Drugs. 2019 Jun 18;17(6):362. doi: 10.3390/md17060362 (PMC6627888; doi:10.3390/md17060362)
Supplement: Supplementary file 1 [file marinedrugs-17-00362-s001.zip › Supplementary Material.xlsx]

## Sheet: Sheet1
Table S1. Primers used for qRT-PCR
Genes		Primers
RIPK1	sense	5' TCAGCTCCTTGCCACCAACA 3'
	anti-sense	5' TCGTCCCACCAATCTCCATA 3'
Bad	sense	5' AGTCGCCACAGCTCCTACCC 3'
	anti-sense	5' CACAAACTCGTCACTCATCC 3'
Bax	sense	5' AGGATGCGTCCACCAAGAAG 3'
	anti-sense	5' CCCGGAGGAAGTCCAATGTC 3'
Bim	sense	5' CCTACCTCCCTACAGACAGA 3'
	anti-sense	5' TGCATAGTAAGCGTTAAACT 3'
Bak	sense	5' GCAGGTAGCCCAGGACACAG 3'
	anti-sense	5' GTAGCCGAAGCCCAGAAGAG 3'
Bcl-2	sense	5' CGGTGGGGTCATGTGTGTGG 3'
	anti-sense	5' GTGTGCAGGTGCCGGTTCAG 3'
Bcl-xl	sense	5' TGCGTGGAAAGCGTAGACAA 3'
	anti-sense	5' AGAGTGAGCCCAGCAGAACC 3'
